# Supplementary material
Source: PubMed Central journal article supplement (PMC7556346)
Supplement: NIHMS1610548-supplement-4.pdf [file NIHMS1610548-supplement-4.pdf]

# Parallel Glyco-SPOT Synthesis of Glycopeptide Libraries

Akul Y. Mehta, Ravi Kumar H. Veeraiah, Sucharita Dutta, Christoffer K. Goth, Melinda S. Hanes, Chao Gao, Kathrin Stavenhagen, Robert Kardish, Yasuyuki Matsumoto, Jamie Heimbürg-Molinaro, Michael Boyce, Nicola L. B. Pohl, Richard D. Cummings

## Supplementary Information

### Contents

|                             |    |
|-----------------------------|----|
| Supplementary Figures ..... | 2  |
| Figure S1.....              | 2  |
| Figure S2.....              | 3  |
| Figure S3.....              | 4  |
| Figure S4.....              | 5  |
| Figure S5.....              | 6  |
| Figure S6.....              | 7  |
| Figure S7.....              | 8  |
| Supplementary Tables .....  | 9  |
| Table S1.....               | 9  |
| Table S2.....               | 10 |
| Table S3.....               | 11 |
| Table S4.....               | 12 |
| Table S5.....               | 13 |

## Supplementary Figures

Figure S1

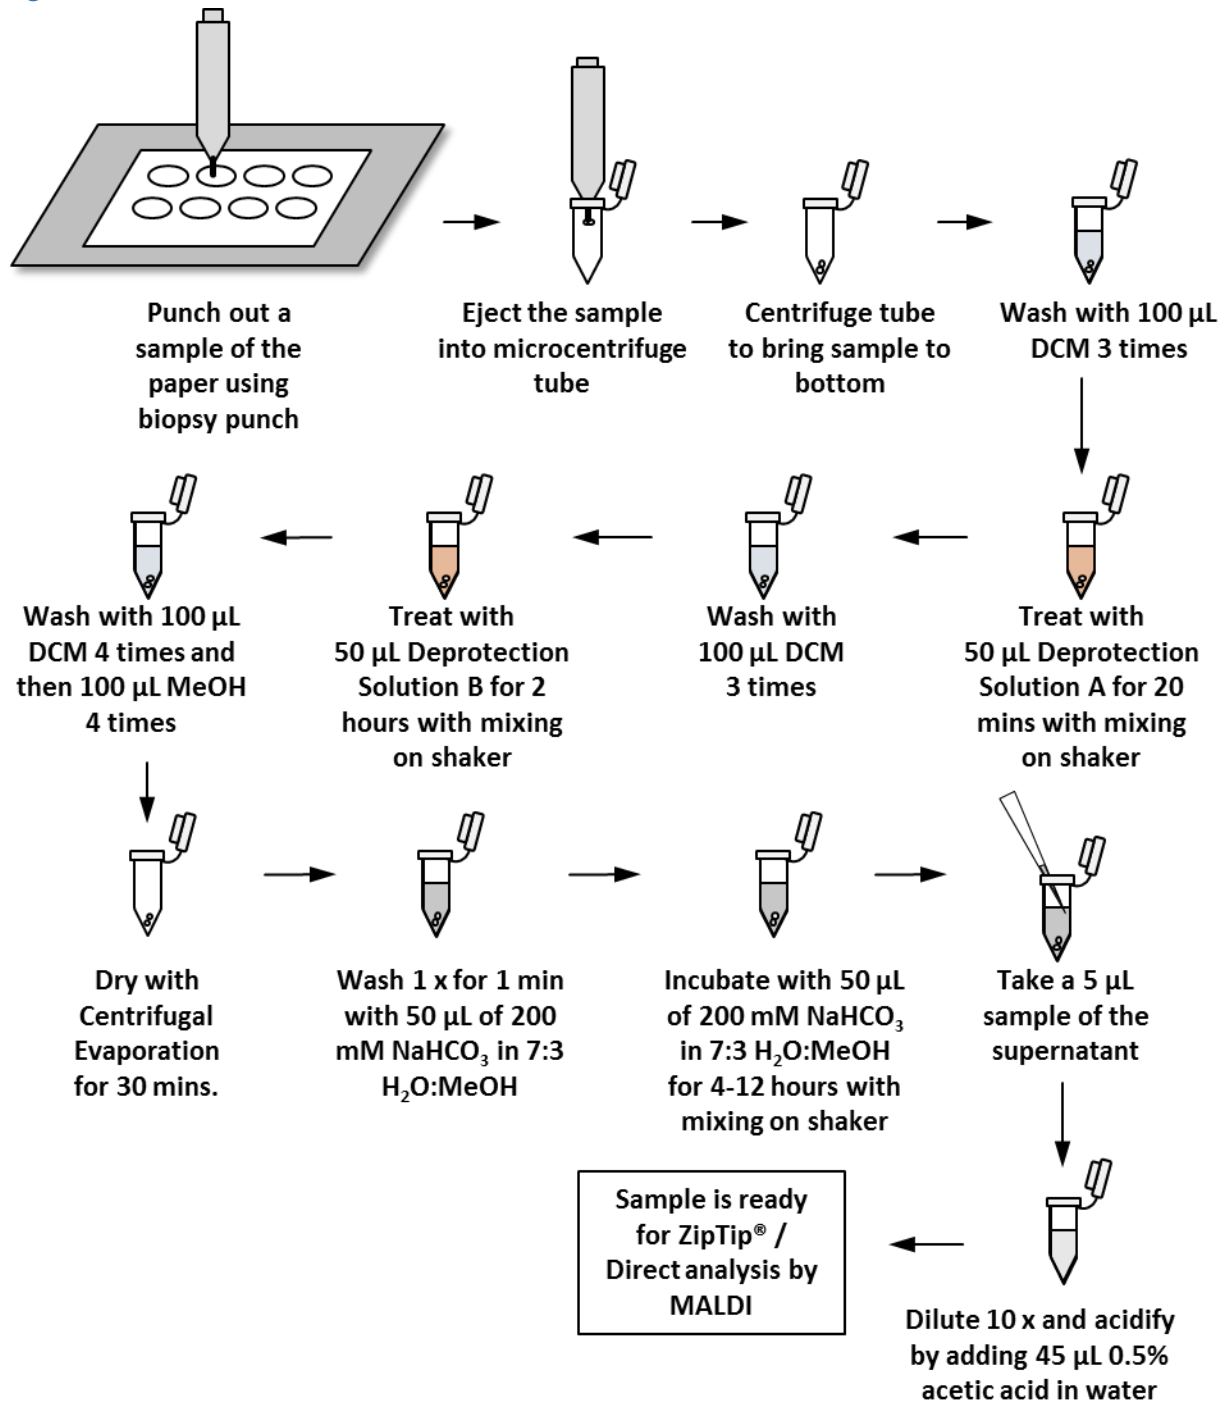

**Figure S1.** Related to Figure 2. Schematic diagram of the biopsy procedure to test the Glyco-SPOT synthesis. A sample of the paper can be taken any time of the synthesis and be processed to globally deprotect the side chains and then release the peptide for analysis with MALDI or other method.

Figure S2

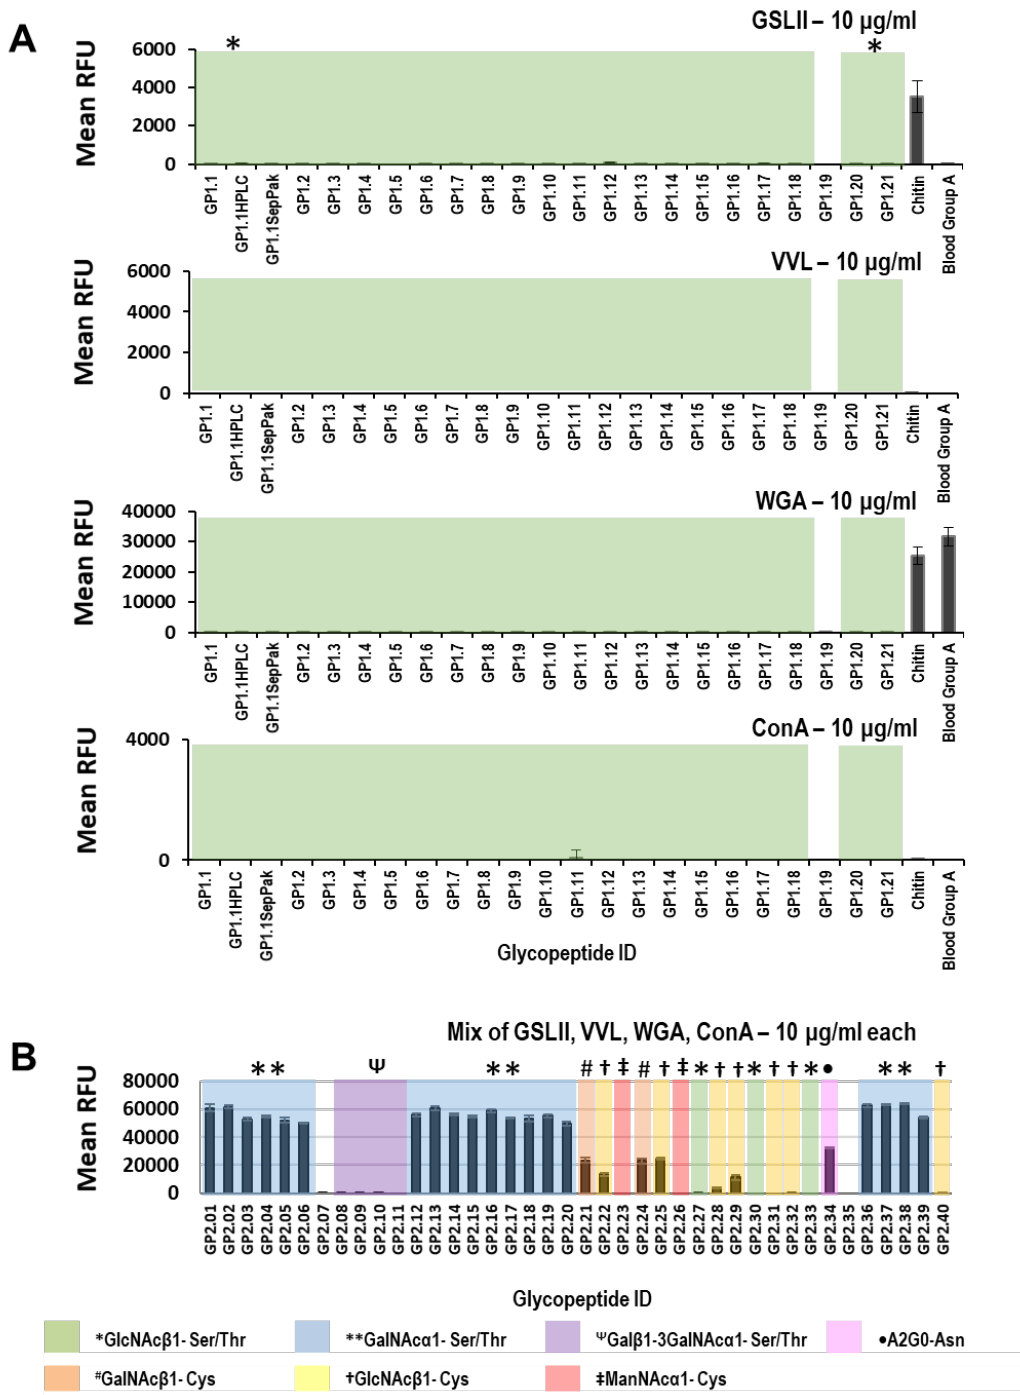

**Figure S2.** Related to Figure 4. Lectin binding tests performed on (A) GP1 array and (B) GP2 array. For the GP1 array individual lectins were incubated on the array at 10 µg/ml while for the GP2 array a mixture of the same lectins was utilized at 10 µg/ml concentrations. The lectins showed little to no binding to the GlcNAc $\beta$ 1-Ser/Thr/Cys, however they show significant binding to other glycoamino acid containing peptides.

Figure S3

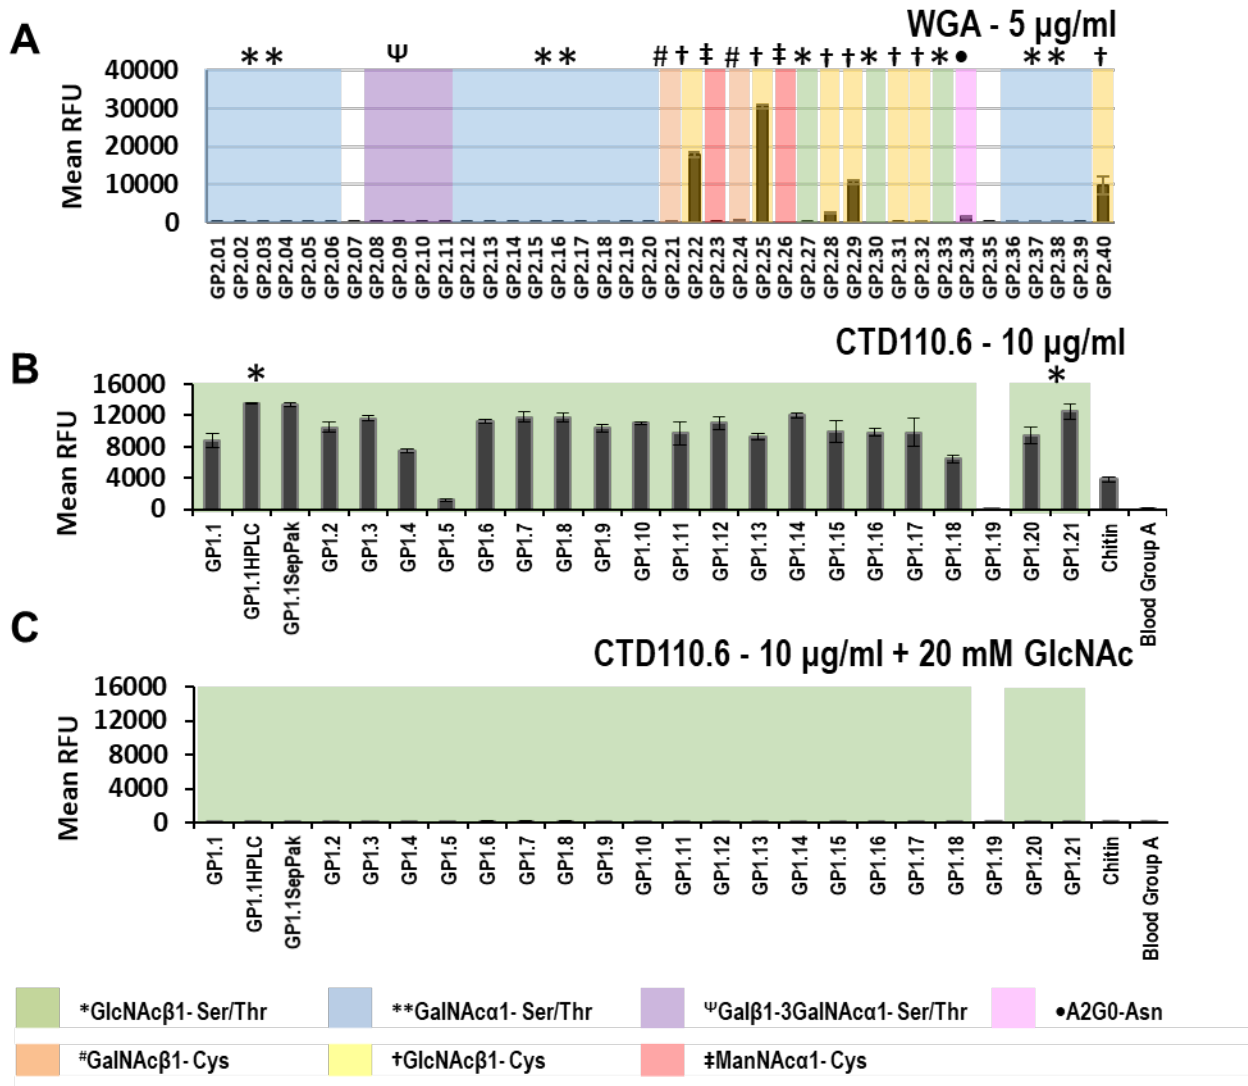

**Figure S3.** Related to Figure 4. (A) WGA binding at 5 µg/ml concentration on GP2 array. The data demonstrates how binding of WGA to the GlcNAc containing glycans on the microarray is very sequence dependant. For example, GP2.25 which is the 14-3-3 protein peptide with GlcNAcβ1-Cys binds strongly, while the same sequence having the GlcNAcβ1-Ser in the same position in GP2.27 shows no binding. Another observation is that GP2.28 (GlcNAcβ1-Cys) with an Asp12 shows no binding and its corresponding GlcNAcβ1-Ser congener in GP2.30 shows no binding; however, when Asp12 is mutated to Ala as in the case of GP2.29 there is slight binding by WGA. (B, C) Hapten competition on the GP1 array for CTD110.6 antibody. (B) Binding of CTD110.6 antibody without any hapten. (C) Binding of the antibody in the presence of 20 mM GlcNAc hapten. The hapten is able to completely prevent the binding of the antibody to the array, suggesting that the antibody binding to the array is primarily GlcNAc driven.

Figure S4

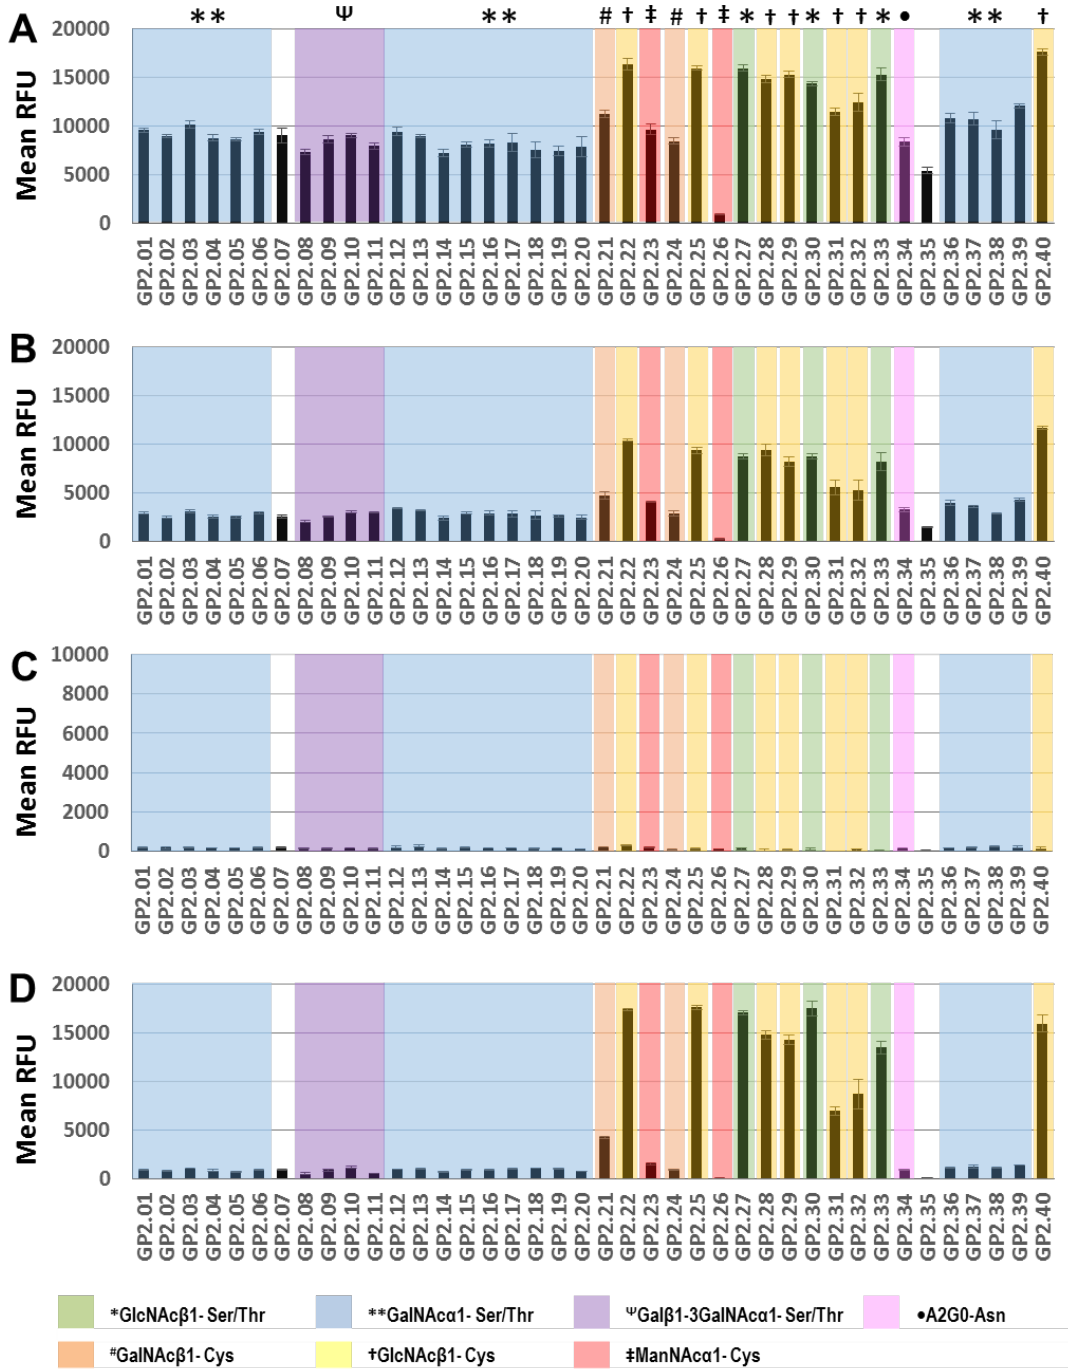

**Figure S4.** Related to Figure 4. Non-specific binding of CTD110.6 antibody on GP2 array when glycopeptides are printed at 100  $\mu$ M concentration. (A, B) Binding of antibody when incubated at 10  $\mu$ g/ml or 1  $\mu$ g/ml respectively. (C) Hapten competition with 20 mM GlcNAc as hapten thereby preventing binding on the array completely. (D) Reduction of non-specific binding of the antibody by utilizing GaNAc as the hapten suggesting potential use of hapten to bring out the specificity of the antibody under high concentration conditions.

Figure S5

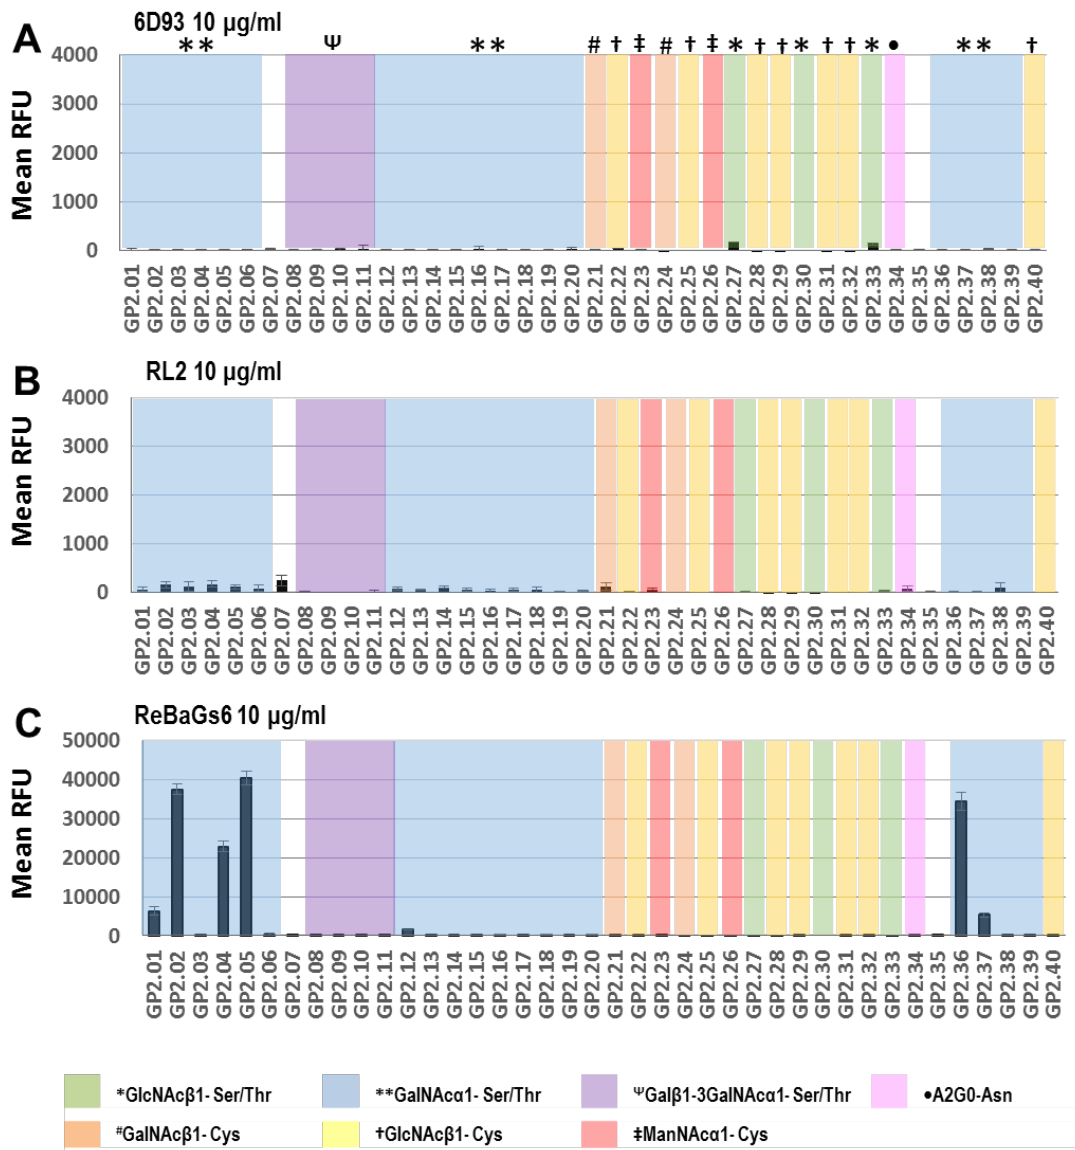

**Figure S5.** Related to Figure 4. Testing of other antibodies on the GP2 array. (A, B) Binding of 6D93 and RL2 antibody (believed to bind GlcNAcβ1-Ser/Thr), however both showed no significant binding on our arrays. This could indicate inactive antibodies and in fact demonstrates possible utility of such microarrays for quality control testing of such antibodies. (C) Binding of recombinant BaGs6 (ReBaGs6) antibody on the GP2 array. The result shows that the ReBaGs6 antibody binds significantly higher to peptides with GalNAcα1-Ser (GP2.02, GP2.04, GP2.05, GP2.36) over GalNAcα1-Thr (GP2.01, GP2.03, GP2.06 and GP2.37). Such specificity has never been demonstrated before for this antibody.

Figure S6

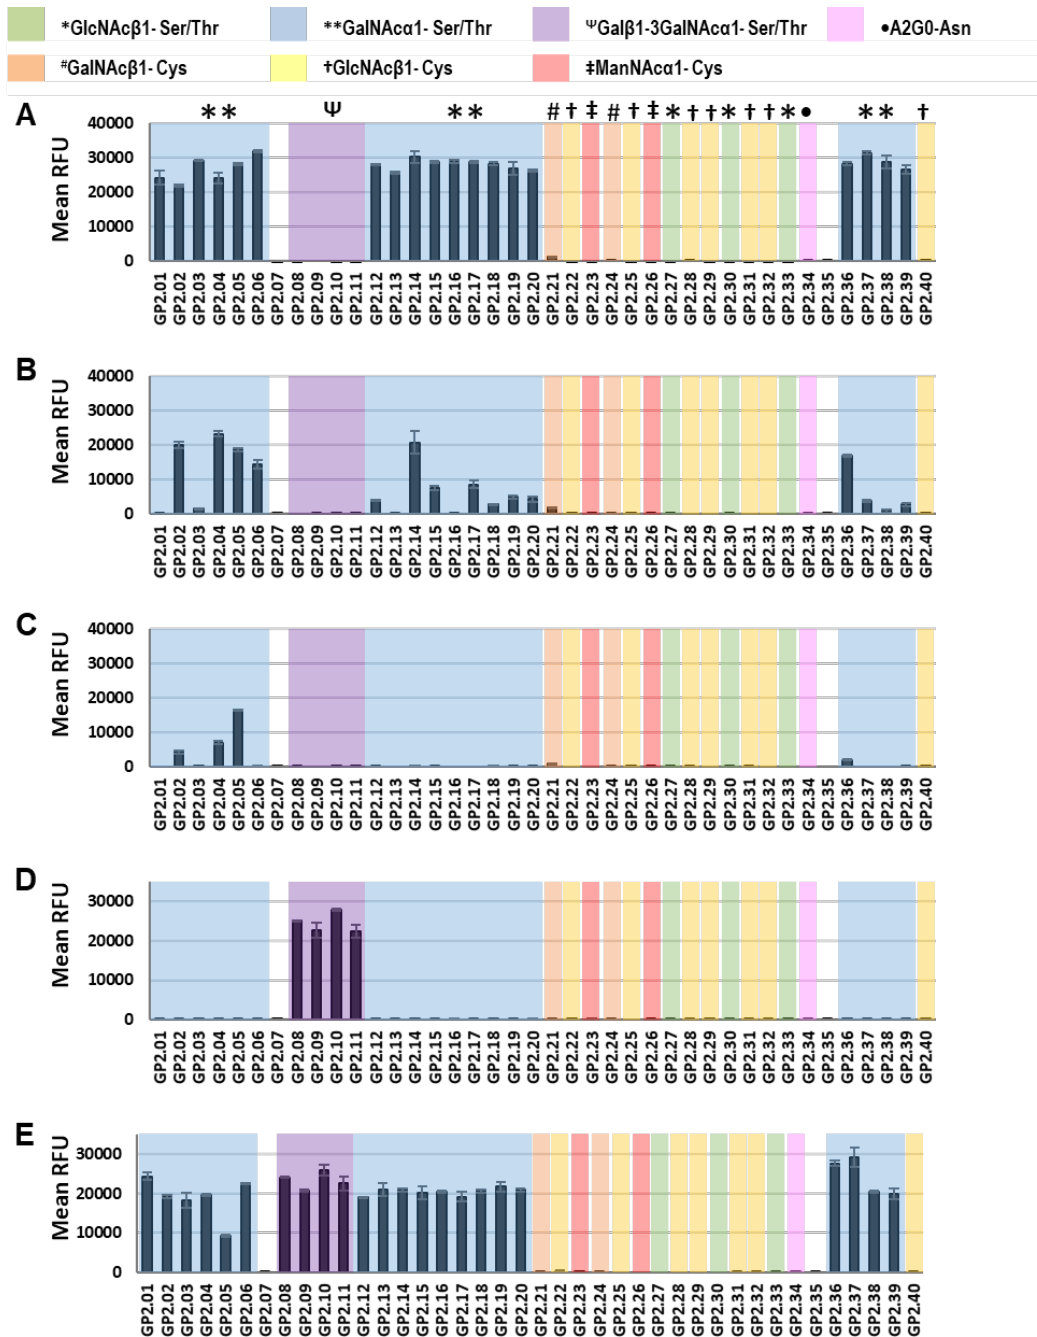

**Figure S6.** Related to Figure 5. On array glycosylation. (A) Biotinylated-VVL 5 μg/ml and Streptavidin-Cy5 1 μg/ml (B) ST6GalNAc1 5 μg/ml with CMP-Sialic Acid (2.2 mM) was incubated for 18h at 37°C followed by staining as done in Panel A. (C) ST6GalNAc1 100 μg/ml with CMP-Sialic Acid (2.2 mM) was incubated for 18h at 37°C followed by lectin staining as done in Panel A. (D) Biotinylated-PNA 5 μg/ml and Streptavidin-Cy5 1 μg/ml (E) T-synthase (50 μg/ml) with Cosmc 1 μg/ml and UDP-Galactose (2.5 mM) was incubated for 18h at 37°C followed by lectin staining as done in Panel D.

Figure S7

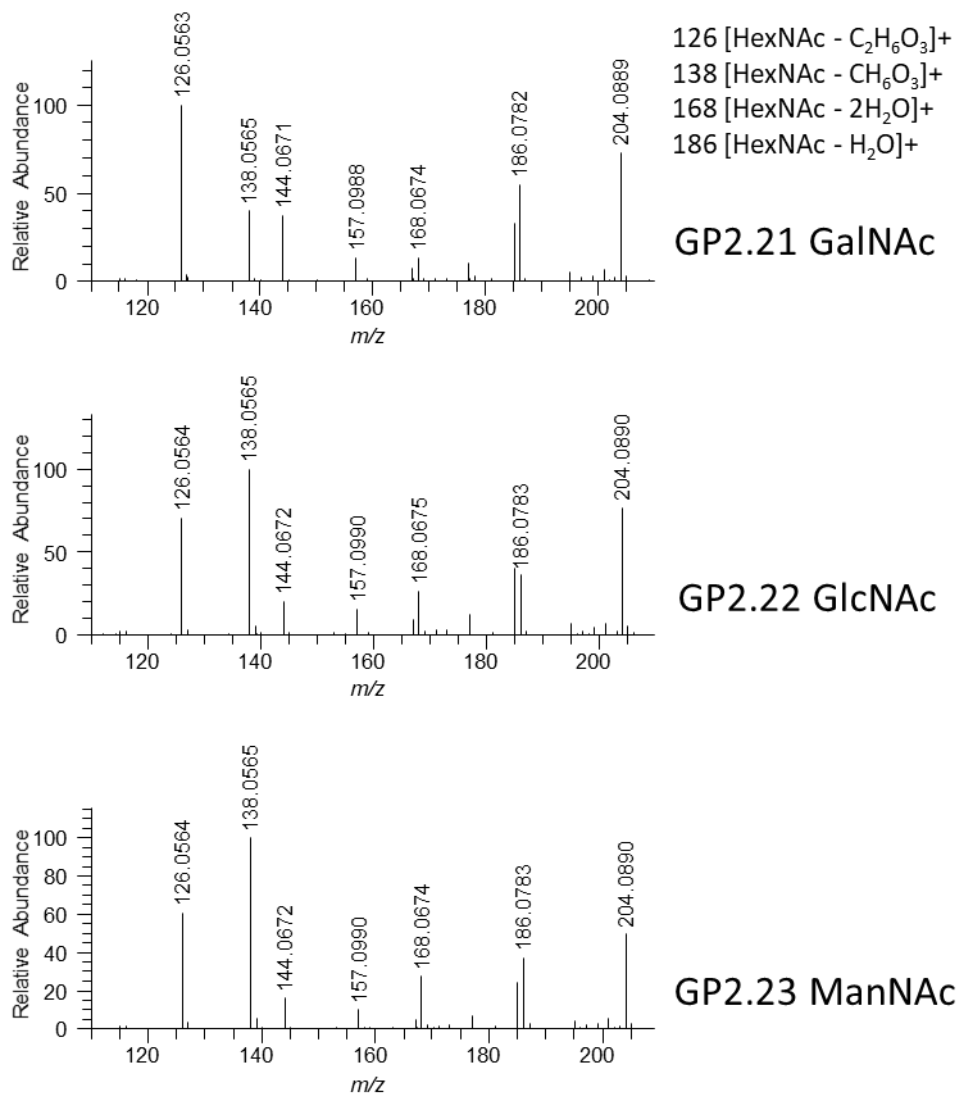

**Figure S7.** Related to Figure 7. Oxonium ion spectra of GP2.21-23. The HCD spectra are shown in the mass range of  $m/z$  110 –  $m/z$  210 using normalized collision energy of 25% (+/- 5%).



## Supplementary Tables

**Table S1.** Related to Figure 2. GP1 library of glycopeptides. Amino acids are color coded to highlight differences. Special amino acids are highlighted in the key below. GP1.1- prototypical sequence. GP1.19- the only peptide in this library without a GlcNAc. GP1.20- a random sequence. GP1.21- the reverse sequence of the prototypical sequence. Special amino acid GlcNAc $\beta$ 1-Ser is highlighted in green as shown in key below.

| Pep. No. | N-Cap | Residues |   |   |   |   |   |   |   |   |    |    |    |    |    |    |    |    |    |    |    | C-term |    |    |
|----------|-------|----------|---|---|---|---|---|---|---|---|----|----|----|----|----|----|----|----|----|----|----|--------|----|----|
|          |       | 1        | 2 | 3 | 4 | 5 | 6 | 7 | 8 | 9 | 10 | 11 | 12 | 13 | 14 | 15 | 16 | 17 | 18 | 19 | 20 |        | 21 | 22 |
| GP1.1    | Ac    | K        | T | S | T | T | A | T | P | P | V  | S  | Q  | A  | S  | S  | T  | T  | T  | S  | T  | W      | A  | OH |
| GP1.2    | Ac    | K        | T | S | T | T | A | T | P | A | V  | S  | Q  | A  | S  | S  | T  | T  | T  | S  | T  | W      | A  | OH |
| GP1.3    | Ac    | K        | T | S | T | T | A | T | P | L | V  | S  | Q  | A  | S  | S  | T  | T  | T  | S  | T  | W      | A  | OH |
| GP1.4    | Ac    | K        | T | S | T | T | A | T | P | P | T  | S  | Q  | A  | S  | S  | T  | T  | T  | S  | T  | W      | A  | OH |
| GP1.5    | Ac    | K        | T | S | T | T | A | T | P | P | E  | S  | Q  | A  | S  | S  | T  | T  | T  | S  | T  | W      | A  | OH |
| GP1.6    | Ac    | K        | T | S | T | T | A | T | P | P | V  | S  | A  | A  | S  | S  | T  | T  | T  | S  | T  | W      | A  | OH |
| GP1.7    | Ac    | K        | T | S | T | T | A | T | P | P | V  | S  | T  | A  | S  | S  | T  | T  | T  | S  | T  | W      | A  | OH |
| GP1.8    | Ac    | K        | T | S | T | T | A | T | P | P | V  | S  | D  | A  | S  | S  | T  | T  | T  | S  | T  | W      | A  | OH |
| GP1.9    | Ac    | K        | T | S | T | T | A | T | P | P | V  | S  | Q  | S  | S  | S  | T  | T  | T  | S  | T  | W      | A  | OH |
| GP1.10   | Ac    | K        | T | S | T | T | A | T | P | P | V  | S  | Q  | L  | S  | S  | T  | T  | T  | S  | T  | W      | A  | OH |
| GP1.11   | Ac    | K        | T | S | T | T | R | T | P | P | V  | S  | Q  | A  | S  | S  | T  | T  | T  | S  | T  | W      | A  | OH |
| GP1.12   | Ac    | K        | T | S | T | T | A | T | R | P | V  | S  | Q  | A  | S  | S  | T  | T  | T  | S  | T  | W      | A  | OH |
| GP1.13   | Ac    | K        | T | S | T | T | A | T | P | Y | V  | S  | Q  | A  | S  | S  | T  | T  | T  | S  | T  | W      | A  | OH |
| GP1.14   | Ac    | K        | T | S | T | T | A | T | A | P | V  | S  | Q  | A  | S  | S  | T  | T  | T  | S  | T  | W      | A  | OH |
| GP1.15   | Ac    | K        | T | S | T | T | A | T | P | P | V  | S  | Q  | P  | S  | S  | T  | T  | T  | S  | T  | W      | A  | OH |
| GP1.16   | Ac    | K        | T | S | T | T | A | T | P | P | V  | S  | Q  | A  | P  | S  | T  | T  | T  | S  | T  | W      | A  | OH |
| GP1.17   | Ac    | K        | T | S | T | T | A | T | R | S | V  | S  | Q  | P  | S  | S  | T  | T  | T  | S  | T  | W      | A  | OH |
| GP1.18   | Ac    | K        | T | S | T | T | A | R | P | P | V  | S  | Q  | P  | S  | S  | T  | T  | T  | S  | T  | W      | A  | OH |
| GP1.19   | Ac    | K        | T | S | T | T | A | T | P | P | V  | S  | Q  | A  | S  | S  | T  | T  | T  | S  | T  | W      | A  | OH |
| GP1.20   | Ac    | K        | P | S | T | T | A | S | P | T | T  | S  | Q  | A  | T  | S  | S  | T  | T  | V  | T  | W      | A  | OH |
| GP1.21   | Ac    | K        | T | S | T | T | T | S | S | A | Q  | S  | V  | P  | P  | T  | A  | T  | T  | S  | T  | W      | A  | OH |

| Key of Special Residues |                          |
|-------------------------|--------------------------|
| S                       | GlcNAc $\beta$ 1- Serine |

**Table S2.** Related to Figure 2. GP2 library of glycopeptides. Amino acids are color coded to highlight differences. Special amino acids are highlighted in the key alongside.

| Pep. No. | Peptide Description          | N-term | Residues |   |   |   |   |   |   |   |   |    |    |    |    | C-term |
|----------|------------------------------|--------|----------|---|---|---|---|---|---|---|---|----|----|----|----|--------|
|          |                              |        | 1        | 2 | 3 | 4 | 5 | 6 | 7 | 8 | 9 | 10 | 11 | 12 | 13 |        |
| GP2.1    | IgA peptide mono-GalNAc - 01 | FI     | K        | V | P | S | T | P | P | T | P | S  | P  | S  | A  | OH     |
| GP2.2    | IgA peptide mono-GalNAc - 02 | FI     | K        | V | P | S | S | P | P | T | P | S  | P  | S  | A  | OH     |
| GP2.3    | IgA peptide mono-GalNAc - 03 | FI     | K        | V | P | S | T | P | P | T | P | S  | P  | S  | A  | OH     |
| GP2.4    | IgA peptide mono-GalNAc - 04 | FI     | K        | V | P | S | T | P | P | S | P | S  | P  | S  | A  | OH     |
| GP2.5    | IgA peptide mono-GalNAc - 05 | FI     | K        | V | P | S | T | P | P | T | P | S  | P  | S  | A  | OH     |
| GP2.6    | IgA peptide mono-GalNAc - 06 | FI     | K        | V | P | S | T | P | P | T | P | T  | P  | S  | A  | OH     |
| GP2.7    | IgA peptide mono-GalNAc - 07 | FI     | K        | V | P | S | T | P | P | T | P | S  | P  | S  | A  | OH     |
| GP2.8    | IgA peptide GalGalNAc -01    | FI     | K        | V | P | S | T | P | P | T | P | S  | P  | S  | A  | OH     |
| GP2.9    | IgA peptide GalGalNAc -02    | FI     | K        | V | P | S | T | P | P | T | P | S  | P  | S  | A  | OH     |
| GP2.10   | IgA peptide GalGalNAc -03    | FI     | K        | V | P | S | T | P | P | T | P | S  | P  | S  | A  | OH     |
| GP2.11   | IgA peptide GalGalNAc -04    | FI     | K        | V | P | S | T | P | P | T | P | S  | P  | S  | A  | OH     |
| GP2.12   | IgA P→A 01                   | FI     | K        | V | P | S | T | A | P | T | P | S  | P  | S  | A  | OH     |
| GP2.13   | IgA P→A 02                   | FI     | K        | V | P | S | T | P | A | T | P | S  | P  | S  | A  | OH     |
| GP2.14   | IgA P→A 03                   | FI     | K        | V | P | S | T | P | P | T | A | S  | P  | S  | A  | OH     |
| GP2.15   | IgA P → X 01                 | FI     | K        | V | P | S | T | X | P | T | P | S  | P  | S  | A  | OH     |
| GP2.16   | IgA P → X 02                 | FI     | K        | V | P | S | T | P | X | T | P | S  | P  | S  | A  | OH     |
| GP2.17   | IgA P → X 03                 | FI     | K        | V | P | S | T | P | P | T | X | S  | P  | S  | A  | OH     |
| GP2.18   | IgA P → x 01                 | FI     | K        | V | P | S | T | x | P | T | P | S  | P  | S  | A  | OH     |
| GP2.19   | IgA P → x 02                 | FI     | K        | V | P | S | T | P | x | T | P | S  | P  | S  | A  | OH     |
| GP2.20   | IgA P → x 03                 | FI     | K        | V | P | S | T | P | P | T | x | S  | P  | S  | A  | OH     |
| GP2.21   | S-GalNAc IgA peptide         | FI     | K        | V | P | S | T | P | P | C | P | S  | P  | S  | A  | OH     |
| GP2.22   | S-GlcNAc IgA Peptide         | FI     | K        | V | P | S | T | P | P | C | P | S  | P  | S  | A  | OH     |
| GP2.23   | S-ManNAc IgA Peptide         | FI     | K        | V | P | S | T | P | P | C | P | S  | P  | S  | A  | OH     |
| GP2.24   | S-GalNAc 14-3-3 Peptide      | Ac     | K        | Y | L | A | E | V | A | C | G | D  | D  | R  | A  | OH     |
| GP2.25   | S-GlcNAc 14-3-3 Peptide      | Ac     | K        | Y | L | A | E | V | A | C | G | D  | D  | R  | A  | OH     |
| GP2.26   | S-ManNAc 14-3-3 Peptide      | Ac     | K        | Y | L | A | E | V | A | C | G | D  | D  | R  | A  | OH     |
| GP2.27   | O-GlcNAc 14-3-3 Peptide      | Ac     | K        | Y | L | A | E | V | A | S | G | D  | D  | R  | A  | OH     |
| GP2.28   | S-GlcNAc PCBP1 Peptide       | Ac     | K        | S | S | P | V | I | C | A | G | G  | Q  | D  | A  | OH     |
| GP2.29   | S-GlcNAc PCBP1 Peptide D→A   | Ac     | K        | S | S | P | V | I | C | A | G | G  | Q  | A  | A  | OH     |
| GP2.30   | O-GlcNAc PCBP1 Peptide       | Ac     | K        | S | S | P | V | I | S | A | G | G  | Q  | D  | A  | OH     |
| GP2.31   | S-GlcNAc Antigen KI-67       | Ac     | K        | T | T | K | I | P | C | D | S | P  | Q  | S  | A  | OH     |
| GP2.32   | S-GlcNAc Antigen KI-67 D→A   | Ac     | K        | T | T | K | I | P | C | A | S | P  | Q  | S  | A  | OH     |
| GP2.33   | O-GlcNAc Antigen KI-67       | Ac     | K        | T | T | K | I | P | S | D | S | P  | Q  | S  | A  | OH     |
| GP2.34   | SGP sequence with N-Glycan   | FI     | K        | V | A | L | N | K | T | A |   |    |    |    |    | OH     |
| GP2.35   | Truncate for testing         | FI     | K        | P | T | P | S | P | S | A |   |    |    |    |    | OH     |
| GP2.36   | IgA double sugar 1           | FI     | K        | V | P | S | T | P | P | S | P | S  | P  | S  | A  | OH     |
| GP2.37   | IgA double sugar 2           | FI     | K        | V | P | S | T | P | P | T | P | S  | P  | S  | A  | OH     |
| GP2.38   | IgA double X                 | FI     | K        | V | P | S | T | X | X | T | P | S  | P  | S  | A  | OH     |
| GP2.39   | IgA double x                 | FI     | K        | V | P | S | T | x | x | T | P | S  | P  | S  | A  | OH     |
| GP2.40   | Repeat Peptide #21           | FI     | K        | V | P | S | T | P | P | C | P | S  | P  | S  | A  | OH     |

| Key of Special Residues |                                             |
|-------------------------|---------------------------------------------|
| <b>S</b>                | Serine                                      |
| <b>T</b>                | Threonine                                   |
| <b>S</b>                | GalNAc $\alpha$ 1- Serine                   |
| <b>T</b>                | GalNAc $\alpha$ 1- Threonine                |
| <b>S</b>                | Gal $\beta$ 1-3GalNAc $\alpha$ 1- Serine    |
| <b>T</b>                | Gal $\beta$ 1-3GalNAc $\alpha$ 1- Threonine |
| <b>X</b>                | (2S,4R)-Fluoroproline (trans)               |
| <b>x</b>                | (2S,4S)-fluoroproline (cis)                 |
| <b>C</b>                | GalNAc $\beta$ 1- Cysteine                  |
| <b>C</b>                | GlcNAc $\beta$ 1- Cysteine                  |
| <b>C</b>                | ManNAc $\alpha$ 1- Cysteine                 |
| <b>N</b>                | N-Glycan heptasaccharide (A2G0)             |
|                         |                                             |
| <b>S</b>                | GlcNAc $\beta$ 1- Serine                    |
| <b>FI</b>               | Fluorescein                                 |

**Table S3.** Related to STAR Methods. List of conditions tried to optimize release of glycopeptides from surface.

| Base                                                                                      | Release                                                              | Acetyls                                                               | $\beta$ -elimination with GlcNAc | TFA Adduct      | Tryptophan Oxidation |
|-------------------------------------------------------------------------------------------|----------------------------------------------------------------------|-----------------------------------------------------------------------|----------------------------------|-----------------|----------------------|
| 0.5% Triethylamine in water 4hrs/20hrs                                                    | 4hr = partial<br>24 = Yes                                            | Complete                                                              | Yes                              | No              | Yes                  |
| 0.1% Triethylamine in water 20hrs                                                         | Yes                                                                  | Complete                                                              | No                               | No              | Yes                  |
| 0.5% Triethylamine + 0.5% dimethylglycine pH 10.1 20hrs                                   | Yes                                                                  | Complete                                                              | No                               | No              | Yes                  |
| 0.5% Triethylamine + 0.15% Acetic Acid pH 9.8 20hrs                                       | Yes                                                                  | No                                                                    | No                               | No              | Yes                  |
| 0.5% Triethylamine + 0.5% dimethylglycine + 0.25% $\beta$ -mercaptoethanol in water 20hrs | Yes                                                                  | Partial                                                               | No                               | No              | Yes                  |
| 0.5% Triethylamine + 0.5% $\beta$ -mercaptoethanol in water 20hrs                         | Yes                                                                  | Partial                                                               | Yes (little)                     | No              | Yes                  |
| 5mM NaOMe 4hrs/24 hrs                                                                     | No                                                                   | -                                                                     | -                                | -               | -                    |
| 10mM NaOMe 4hrs                                                                           | Yes (little)                                                         | Partial                                                               | Yes (little)                     | Yes             | No                   |
| 20mM NaOMe 4hrs                                                                           | Yes                                                                  | Partial                                                               | Yes                              | Yes             | No                   |
| 20mM NaOMe elution every 1 hr                                                             | Yes                                                                  | No                                                                    | Yes                              | Yes<br>(Little) | No                   |
| Gaseous Ammonia (tried various time points)                                               | Yes                                                                  | -                                                                     | Yes (complete)                   | No              | No                   |
| Aqueous Ammonia                                                                           | Yes                                                                  | -                                                                     | Yes (complete)                   | No              | No                   |
| Methanolic Ammonia                                                                        | Yes                                                                  | -                                                                     | Yes (complete)                   | No              | No                   |
| Aqueous Hydrazine solution (5% concentration)                                             | Yes                                                                  | Partial                                                               | Yes                              | No              | No                   |
| 1mg/ml LiOH in 3:1 MeOH:H <sub>2</sub> O 2hrs                                             | Yes                                                                  | Complete                                                              | Yes                              | No              | No                   |
| 100mM NaHCO <sub>3</sub> in water 24-72hrs                                                | Yes (slow<br>sometimes<br>partial requiring<br>multiple<br>releases) | Slow<br>(sometimes<br>partial<br>requiring<br>multiple<br>treatments) | No                               | No              | No                   |
| 100mM NaHCO <sub>3</sub> in 10% methanol:water                                            | Yes                                                                  | Partial                                                               | No                               | No              | No                   |
| 200mM NaHCO <sub>3</sub> in 1:2 methanol:water                                            | Yes                                                                  | Complete                                                              | No                               | No              | No                   |

**Table S4.** Related to STAR Methods. Yields Obtained.

| Compound | Mol. Wt. | Amount in nmoles | Amount in µg | Method Used      |
|----------|----------|------------------|--------------|------------------|
| GP1.1    | 2456.6   | 98.7             | 243          | A205 Scopes      |
| GP1.2    | 2430.5   | 98.7             | 240          | A205 Scopes      |
| GP1.3    | 2472.6   | 97.7             | 242          | A205 Scopes      |
| GP1.4    | 2458.5   | 113.2            | 278          | A205 Scopes      |
| GP1.5    | 2486.6   | 107.2            | 267          | A205 Scopes      |
| GP1.6    | 2399.5   | 111.1            | 267          | A205 Scopes      |
| GP1.7    | 2429.5   | 64.5             | 157          | A205 Scopes      |
| GP1.8    | 2443.5   | 93.4             | 228          | A205 Scopes      |
| GP1.9    | 2472.6   | 122.0            | 302          | A205 Scopes      |
| GP1.10   | 2498.6   | 79.0             | 198          | A205 Scopes      |
| GP1.11   | 2541.7   | 100.3            | 255          | A205 Scopes      |
| GP1.12   | 2515.6   | 127.2            | 320          | A205 Scopes      |
| GP1.13   | 2522.6   | 110.0            | 278          | A205 Scopes      |
| GP1.14   | 2430.5   | 104.9            | 255          | A205 Scopes      |
| GP1.15   | 2482.6   | 109.8            | 273          | A205 Scopes      |
| GP1.16   | 2466.6   | 65.9             | 163          | A205 Scopes      |
| GP1.17   | 2531.6   | 78.0             | 198          | A205 Scopes      |
| GP1.18   | 2537.7   | 88.7             | 225          | A205 Scopes      |
| GP1.19   | 2253.4   | 66.6             | 150          | A205 Scopes      |
| GP1.20   | 2456.6   | 33.5             | 82           | A205 Scopes      |
| GP1.21   | 2456.6   | 34.8             | 86           | A205 Scopes      |
| GP2.01   | 1825.8   | 58.2             | 106          | Fluorescein A453 |
| GP2.02   | 1811.8   | 93.4             | 169          | Fluorescein A453 |
| GP2.03   | 1825.8   | 81.8             | 149          | Fluorescein A453 |
| GP2.04   | 1811.8   | 110.3            | 200          | Fluorescein A453 |
| GP2.05   | 1825.8   | 127.4            | 233          | Fluorescein A453 |
| GP2.06   | 1839.8   | 88.8             | 163          | Fluorescein A453 |
| GP2.07   | 1622.7   | 154.4            | 250          | Fluorescein A453 |
| GP2.08   | 1987.8   | 147.4            | 293          | Fluorescein A453 |
| GP2.09   | 1987.8   | 107.9            | 214          | Fluorescein A453 |
| GP2.10   | 1987.8   | 83.0             | 165          | Fluorescein A453 |
| GP2.11   | 1987.8   | 97.2             | 193          | Fluorescein A453 |
| GP2.12   | 1799.8   | 74.3             | 134          | Fluorescein A453 |
| GP2.13   | 1799.8   | 79.7             | 143          | Fluorescein A453 |
| GP2.14   | 1799.8   | 143.0            | 257          | Fluorescein A453 |
| GP2.15   | 1843.8   | 88.1             | 162          | Fluorescein A453 |
| GP2.16   | 1843.8   | 81.0             | 149          | Fluorescein A453 |
| GP2.17   | 1843.8   | 78.0             | 144          | Fluorescein A453 |
| GP2.18   | 1843.8   | 94.7             | 175          | Fluorescein A453 |
| GP2.19   | 1843.8   | 94.6             | 174          | Fluorescein A453 |
| GP2.20   | 1843.8   | 108.6            | 200          | Fluorescein A453 |
| GP2.21   | 1827.8   | 97.6             | 178          | Fluorescein A453 |
| GP2.22   | 1827.8   | 35.2             | 64           | Fluorescein A453 |
| GP2.23   | 1827.8   | 84.1             | 154          | Fluorescein A453 |
| GP2.24   | 1654.8   | 50.3             | 83           | BCA              |
| GP2.25   | 1654.8   | 43.3             | 72           | BCA              |
| GP2.26   | 1654.8   | 40.3             | 67           | BCA              |
| GP2.27   | 1638.8   | 41.8             | 68           | BCA              |
| GP2.28   | 1476.7   | 47.1             | 70           | BCA              |
| GP2.29   | 1432.7   | 49.2             | 70           | BCA              |
| GP2.30   | 1460.7   | 49.1             | 72           | BCA              |
| GP2.31   | 1619.8   | 41.9             | 68           | BCA              |
| GP2.32   | 1575.8   | 46.8             | 74           | BCA              |
| GP2.33   | 1603.8   | 41.6             | 67           | BCA              |
| GP2.34   | 2500.0   | 67.5             | 169          | Fluorescein A453 |
| GP2.35   | 1141.5   | 84.8             | 97           | Fluorescein A453 |
| GP2.36   | 2014.9   | 63.0             | 127          | Fluorescein A453 |
| GP2.37   | 2028.9   | 56.0             | 114          | Fluorescein A453 |
| GP2.38   | 1861.8   | 43.8             | 82           | Fluorescein A453 |
| GP2.39   | 1861.8   | 42.6             | 79           | Fluorescein A453 |
| GP2.40   | 1827.8   | 20.0             | 37           | Fluorescein A453 |

**Table S5.** Related to Figure 2. Comparison of GlycoSPOT synthesis vs Other Solid Phase Peptide Synthesis Techniques.

| Parameter                                        | Glyco-SPOT Synthesis                                                                                                               | Classical Resin Synthesis          | Microwave Resin Synthesis                                                              | 96-well Resin Synthesis                                                                | Notes                                                                                                                                                                                                                                          |
|--------------------------------------------------|------------------------------------------------------------------------------------------------------------------------------------|------------------------------------|----------------------------------------------------------------------------------------|----------------------------------------------------------------------------------------|------------------------------------------------------------------------------------------------------------------------------------------------------------------------------------------------------------------------------------------------|
| <b>Ability to Synthesize Libraries</b>           | <b>YES</b>                                                                                                                         | NO                                 | NO                                                                                     | Not used at sub-micromole levels. Less than 3 reports for glycopeptides.*              | SPOT Synthesis and 96-well Resin Synthesis has been used to synthesize libraries of non-glycosylated peptides.                                                                                                                                 |
| Automation                                       | Can possibly be adapted in the future to machines (e.g. MultiPep RSi Automated Peptide Synthesizer with SPOT module from Intavis.) | Yes                                | Yes                                                                                    | Yes                                                                                    | Automation is key to create libraries. While currently not available, there are robotic systems which can be adapted to automated Glyco-SPOT Synthesis and our work in this paper should give impetus to develop such platforms.               |
| Number of Peptides Synthesized in Parallel       | Up to 96/membrane if performed manually (limited by individual sanity).<br>Up to 600/membrane if adapted to machine.               | 1                                  | 1 at a time but can add batch sequences as usually there is a single reaction vessel.  | 96/plate                                                                               | Significantly larger number of peptides can be synthesized in parallel if automated.                                                                                                                                                           |
| Cycle time (usually)                             | 3-4 hours                                                                                                                          | 3-4 hours                          | 5-20 mins                                                                              | 2-3 hours                                                                              | Cycle time is comparable to other methods where heat is not involved. Note- heat is detrimental to certain FPGA coupling. However, cycle time is significantly slower than microwave method.                                                   |
| Usual scale (µmoles)                             | 0.02-0.20 µmoles (based on the two libraries we synthesized average is 0.084 µmoles)                                               | 5-100 µmoles                       | 5-100 µmoles                                                                           | 1-10 µmoles                                                                            | Scale is significantly smaller (>5-50 fold) in comparison to 96-well resin methods.                                                                                                                                                            |
| Visual Detection at Lower Scale at each step     | Yes using bromophenol blue                                                                                                         | Yes                                | Not usually performed as reaction is sealed                                            | Possible but tedious                                                                   | This is advantageous to troubleshoot the reaction.                                                                                                                                                                                             |
| Intermediate Sampling for MALDI during Synthesis | Yes using Biopsy technique described herein                                                                                        | Yes                                | Could result in significant losses due to density of peptide on resin at lower scales. | Could result in significant losses due to density of peptide on resin at lower scales. | This is advantageous to judge efficacy and completion of the reaction. This is especially useful in difficult FPGA couplings which require more time.                                                                                          |
| Amount of amino acid used (µmoles/peptide/cycle) | 0.1-0.5 µmoles                                                                                                                     | 5-200 µmoles                       | 5-200 µmoles                                                                           | 2-20 µmoles (2X excess to scale)                                                       | Significantly lower absolute amounts FPGAs used allowing for more efficient utilization of precious FPGA resources.                                                                                                                            |
| TFA removal step                                 | Not required if final purification on C18 performed with compatible salts (e.g. ammonium acetate).                                 | TFA removal step usually required. | TFA removal step usually required.                                                     | TFA removal step usually required.                                                     | Since the TFA deprotection step is performed prior to the bicarbonate release step, any residual TFA is neutralized and washed away. Therefore, if appropriate salts are used for the purification, TFA removal does not need to be performed. |

\*to the best of our knowledge
